# Supplementary material for: Plasma Supported Deposition of Amorphous Hydrogenated Carbon (a-C:H) on Polyamide 6: Determining Interlayer Completion and Dehydrogenation Effects during Layer Growth
Source: MDPI journal article supplement (doi:10.3390/polym13111886), 2021-06-06
Supplement: s1 [file s1]

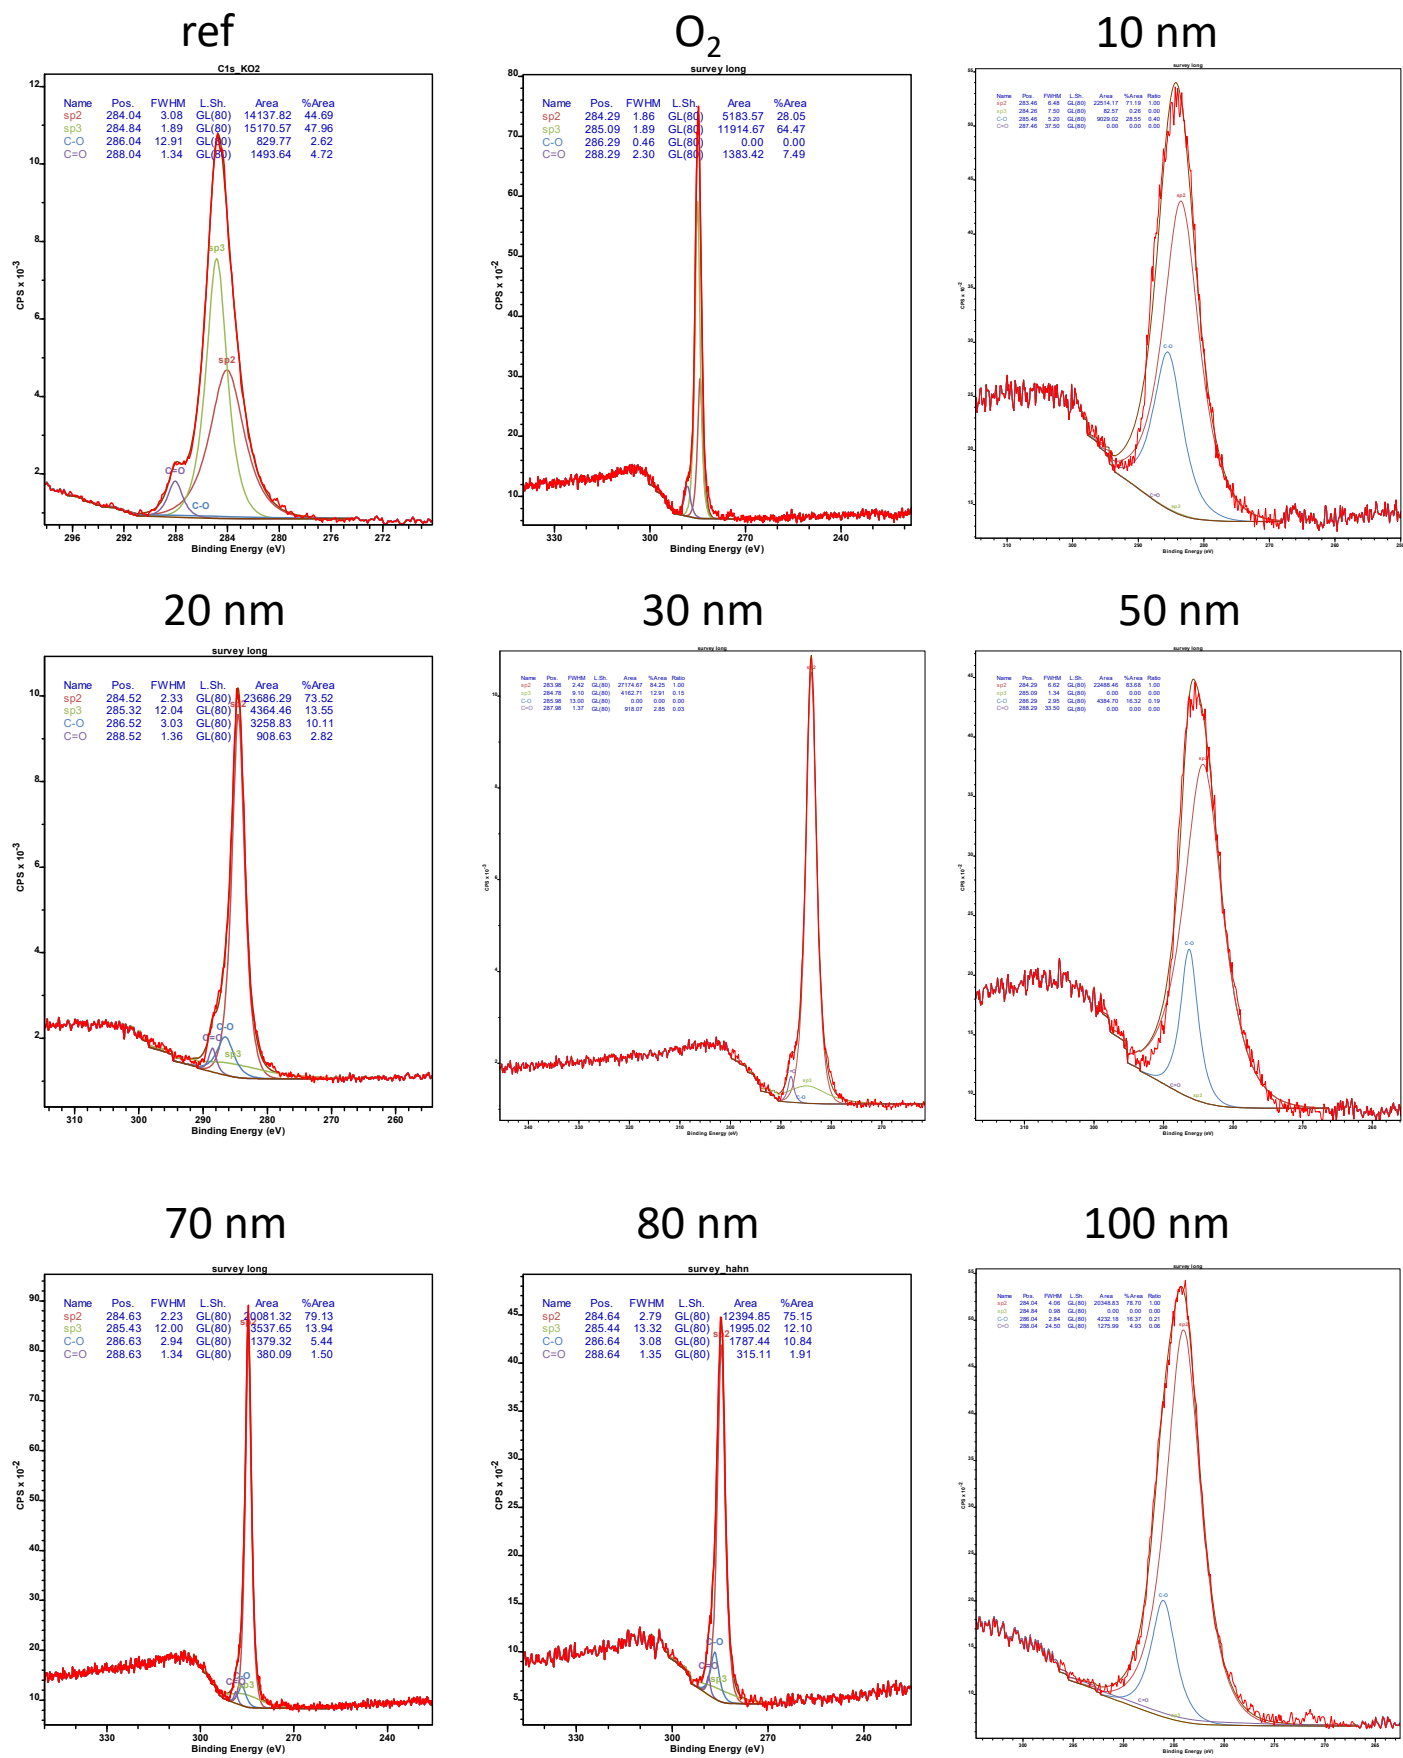

**SI 1.** XPS C1s Peak deconvolution for the reference, O<sub>2</sub> plasma treated sample and the thin layers from 10-100 nm a-C:H film thickness.

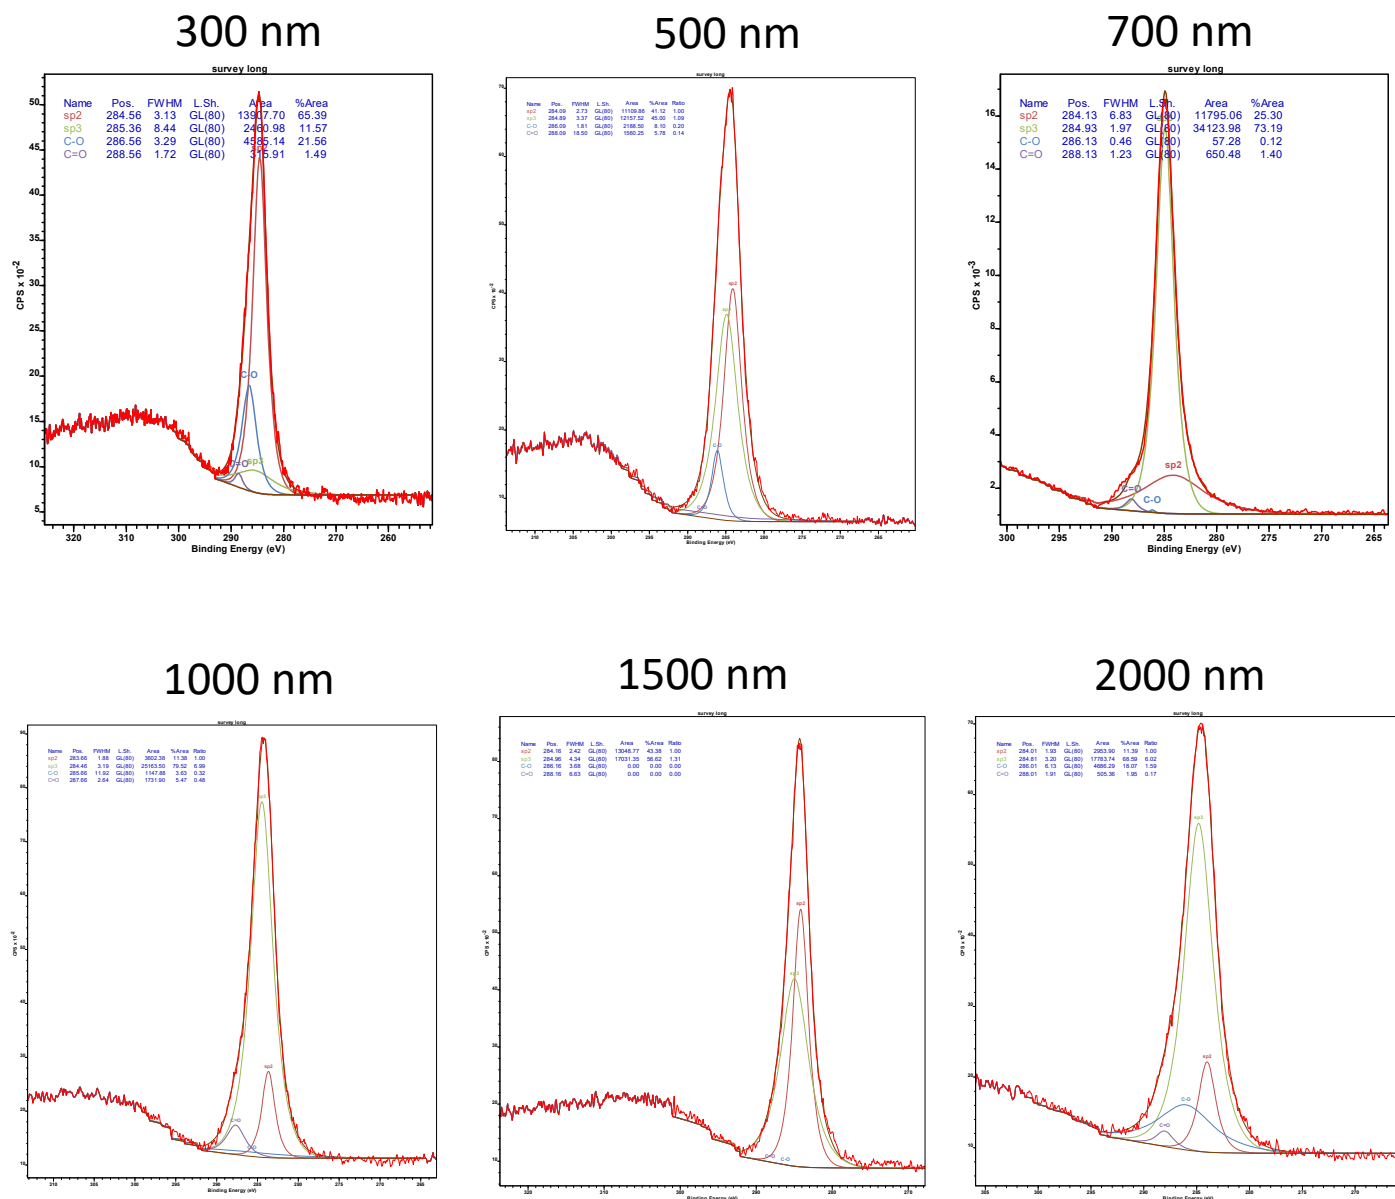

**SI 2.** XPS C1s Peak deconvolution for the PA6 samples coated with thick a-C:H layers (300-2000 nm).
